# Supplementary material
Source: PubMed Central journal article supplement (PMC1895535)
Supplement: blood_blood-2006-02-003327_1.pdf [file blood_blood-2006-02-003327_1.pdf]

| Antigen     | Label           | Clone   | Isotype | Vendor*       |
|-------------|-----------------|---------|---------|---------------|
| CD105       | PE              | SN6     | IgG1    | Caltag        |
| CD106       | APC             | 51-10C9 | IgG1    | BD Pharmingen |
| CD117       | PerCP-Cy5.5     | 104D2   | IgG1    | BDIS          |
| CD13        | FITC            | TUK1    | IgG1    | Caltag        |
| CD166       | PE              | 3A6     | IgG1    | BD Pharmingen |
| CD235a      | PE, FITC, APC   | GA-R2   | IgG2b   | BD Pharmingen |
| CD26        | PE              | L272    | IgG2a   | BDIS          |
| CD31        | FITC, PE        | WM59    | IgG1    | BD Pharmingen |
| CD34        | PE, PerCP-Cy5.5 | 8G12    | IgG1    | BDIS          |
| CD41a       | PE, FITC        | HIP8    | IgG1    | BD Pharmingen |
| CD43 **     | FITC            | 1G10    | IgG1    | BD Pharmingen |
| CD43        | PE              | DFT1    | IgG1    | Chemicon      |
| CD43        | APC             | L10     | IgG1    | Caltag        |
| CD44        | APC             | G44-26  | IgG2b   | BD Pharmingen |
| CD45        | PE, APC         | HI30    | IgG1    | BD Pharmingen |
| CD49d       | PE              | 9F10    | IgG1    | BD Pharmingen |
| CD50        | FITC            | TU41    | IgG2b   | BD Pharmingen |
| CD54        | FITC            | 15.2    | IgG1    | Chemicon      |
| CD73        | PE              | AD2     | IgG1    | BD Pharmingen |
| CD90        | APC             | 5E10    | IgG1    | BD Pharmingen |
| KDR         | PE, APC         | 89106   | IgG1    | R&D Systems   |
| VE-cadherin | PE              | 123413  | IgG2b   | R&D Systems   |

\* BDIS (BD Immunocytometry Systems) (San Jose, CA); BD Pharmingen (San Diego, CA); Caltag Laboratories-Invitrogen (Carlsbad, CA); Chemicon International, Inc. (Temecula, CA); R&D Systems (Minneapolis, MN).

\*\* All results in the present study were obtained using clone 1G10 anti-CD43 mAb. Among other tested clones (DFT1, L10), 1G10 mAb provided the best detection and isolation of functional CD43<sup>+</sup> cells.
