# Supplementary material
Source: PubMed Central journal article supplement (PMC1895535)
Supplement: blood_blood-2006-02-003327_2.pdf [file blood_blood-2006-02-003327_2.pdf]

| Cells                                             | <b>MethoCult GF plus</b><br>(E-, GEMM-, GM-, M-CFCs)<br>#cells/1 ml/dish | <b>MegaCult + SCF, EPO</b><br>(E-, Mk-CFCs)<br>#cells/0.75 ml/chamber |
|---------------------------------------------------|--------------------------------------------------------------------------|-----------------------------------------------------------------------|
| <b>hESC/OP9 coculture</b>                         |                                                                          |                                                                       |
| - days 4-5                                        | 200000                                                                   | NA                                                                    |
| - day 6                                           | 100000                                                                   | NA                                                                    |
| - days 7-8                                        | 50000                                                                    | NA                                                                    |
| - day 9                                           | 20000                                                                    | NA                                                                    |
| - CD34 <sup>-</sup> CD43 <sup>-</sup> (days 6, 9) | 250000                                                                   | NA                                                                    |
| <b>CD34<sup>+</sup> cell subsets</b>              |                                                                          |                                                                       |
| - CD43 <sup>+</sup>                               | 1000                                                                     | NA                                                                    |
| - CD43 <sup>-</sup> KDR <sup>+</sup>              | 20000                                                                    | NA                                                                    |
| - CD43 <sup>-</sup> KDR <sup>-</sup>              | 20000                                                                    | NA                                                                    |
| <b>CD43<sup>+</sup> cell subsets</b>              |                                                                          |                                                                       |
| - CD41a/CD235a <sup>+</sup> CD45 <sup>-</sup>     | 5000                                                                     | 500                                                                   |
| - CD41a/CD235a <sup>-</sup> CD45 <sup>-</sup>     | 400                                                                      | 500                                                                   |
| - CD41a/CD235a <sup>-</sup> CD45 <sup>+</sup>     | 200                                                                      | 500                                                                   |
| - CD41a/CD235a <sup>+</sup> CD45 <sup>+</sup>     | 5000                                                                     | 500                                                                   |

NA indicates not applicable.
