# Supplementary material
Source: PubMed Central journal article supplement (PMC1895535)
Supplement: blood_blood-2006-02-003327_3.pdf [file blood_blood-2006-02-003327_3.pdf]

| Gene        | Forward primer (5'-3')             | Reverse primer (5'-3')              | Ta, °C | Product, bp |
|-------------|------------------------------------|-------------------------------------|--------|-------------|
| CD235a      | ACAGACAAATGATACGCACAAACGGG         | GGGCTTTTCTTTATCAGTCGGCGA            | 56     | 240         |
| CD3ε        | AGTTGGCGTTTGGGGCAAGATGGTAATGAAGAAA | CCCAGGAAACAGGGAGTCGCAGGGGGACTGGAGAG | 62     | 640         |
| CD3ζ        | CTCTGCCTCCCAGCCTCTTT               | GCGTCGTAGGTGTCCTTGGT                | 62     | 481         |
| CD34        | ATGGCTTCCTCCTCCCTCCT               | ATCCCTGCTCAACCCCTCTG                | 62     | 220         |
| CD41a       | GACTGTGAATGGTCTTCACCTC             | ACACGTTGAACCATGCGTGCGA              | 56     | 422         |
| CD43        | TTATCAGCCGAGCCGGTCCCA              | AGGGGCTCCACTGGTCTACT                | 62     | 499         |
| CD45        | TTCAACTTATACCCTTCGTGTC             | CCTGCTTTACTTTGTCCACTTC              | 56     | 463         |
| c-kit       | AAGGACTTGAGGTTTATTCT               | CTGACGTTCATAATTGAAGTC               | 62     | 345         |
| c-mpl       | TGGAGATGCAGTGGCACTTG               | AGAACTGTGGGGCTGTAGT                 | 62     | 206         |
| c-myb       | GTCACAAATTGACTGTTACAACACCCAT       | TTCTACTAGATGAGAGGGTGTCTGAGG         | 62     | 212         |
| Flt-1       | GACTAGATAGCGTCACCAGCAG             | GAAACCGTCAGAATCCTCCTC               | 62     | 203         |
| Flt-3       | CAAGTGCTGTGCATACAATTCCC            | ACCTGTACCATCTGTAGCTGG               | 56     | 207         |
| hGAPDH      | TCCAAAATCAAGTGGGGCGAT              | TTCTAGACGGCAGGTCAGGTC               | 60     | 475         |
| mGAPDH      | GTGGCAAAGTGGAGATTGTTGC             | TTTCTCGTGGTTCACACCCATC              | 60     | 344         |
| GATA-1      | CTCCCTGTCCCCAATAGTGC               | GTCCTTCGGCTGCTCCTGTG                | 62     | 520         |
| GATA-2      | CCCTAAGCAGCGCAGCAA                 | TGACTTCTCCTGCATGCAT                 | 62     | 439         |
| GATA-3      | TGCAGGAGCAGTATCATGAAGCCT           | GCATCAAACAACCTGTGGCCAGTGA           | 60     | 406         |
| HoxB4       | GCACGGTAAACCCCAATTA                | GGCAACTTGTGGTCTTTTTT                | 62     | 202         |
| Ikaros      | TGAGCCCATGCCGATCCCCGAG             | GGTCTTCTGCCATTTCACTGTGATTA          | 60     | 674         |
| IL7Rα       | CAGGGGAGATGGATCCTATC               | CCATACGATAGGCTTAATCC                | 62     | 116         |
| KDR         | ATGCACGGCATCTGGGAATC               | GTCACTGTCTGCAAGTTGCTGTC             | 62     | 573         |
| LMO-2       | GGATCCTGCCGGAGAGACTATCTC           | GAATTCAGTGAACACCTCCGAAA             | 62     | 289         |
| mb-1        | TCCAAGCTCTGCCTGCCACCAT             | GACTGCTGGTATGACTCGTTGC              | 62     | 330         |
| MPO         | AGCGAGGAGCCCCCTGGCCAGGAACCTG       | GAGCTCGGGCATCTCACTGGAACGG           | 60     | 203         |
| NF-E2       | ACCGAGCTGCAGGGTCTGAATGC            | CCAGCTCAAGAGATTGAGCATCGC            | 60     | 378         |
| Pax5        | CCAGTCCCAGCTTCCAGTCACAG            | GGAGACTCCTGAATACCTTCGTCTC           | 62     | 174         |
| PU1         | GGAAGGGTTTCCCCTCGTC                | GGTCGCTATGGCTCTCCCC                 | 62     | 122         |
| RUNX1       | GAAGTCTGAACCCAGCATAGTGGTCAGCAG     | GTGGACGTCTCTAGAAGGATTCATTCCAAG      | 62     | 231         |
| SCL         | AATCGAGTGAAGAGGAGACC               | TGGTCATTGAGCAGCTT                   | 56     | 246         |
| Tie2        | CACCATCCAAACATCATCAATCTC           | CAATCTCCCATAGTAACACAC               | 62     | 453         |
| VE-cadherin | GCAGCAGCAGGTGCTAACC                | TTGCCACATATTCTCCTTTG                | 62     | 101         |
| VpreB       | TTTGTCTACTGCACAGGTTGTGG            | TGCAGTGGGTTCCATTTCTTCC              | 62     | 386         |

All primers, except HoxB4 (mouse/human) and mGAPDH (mouse), are human gene-specific; Ta – annealing temperature; bp – base pairs;
